# Supplementary material
Source: publisher figshare collection journal article supplement (https://frontiersin.figshare.com/ndownloader/files/27567524)
Supplement: Supplementary file 1 [file 27567524]

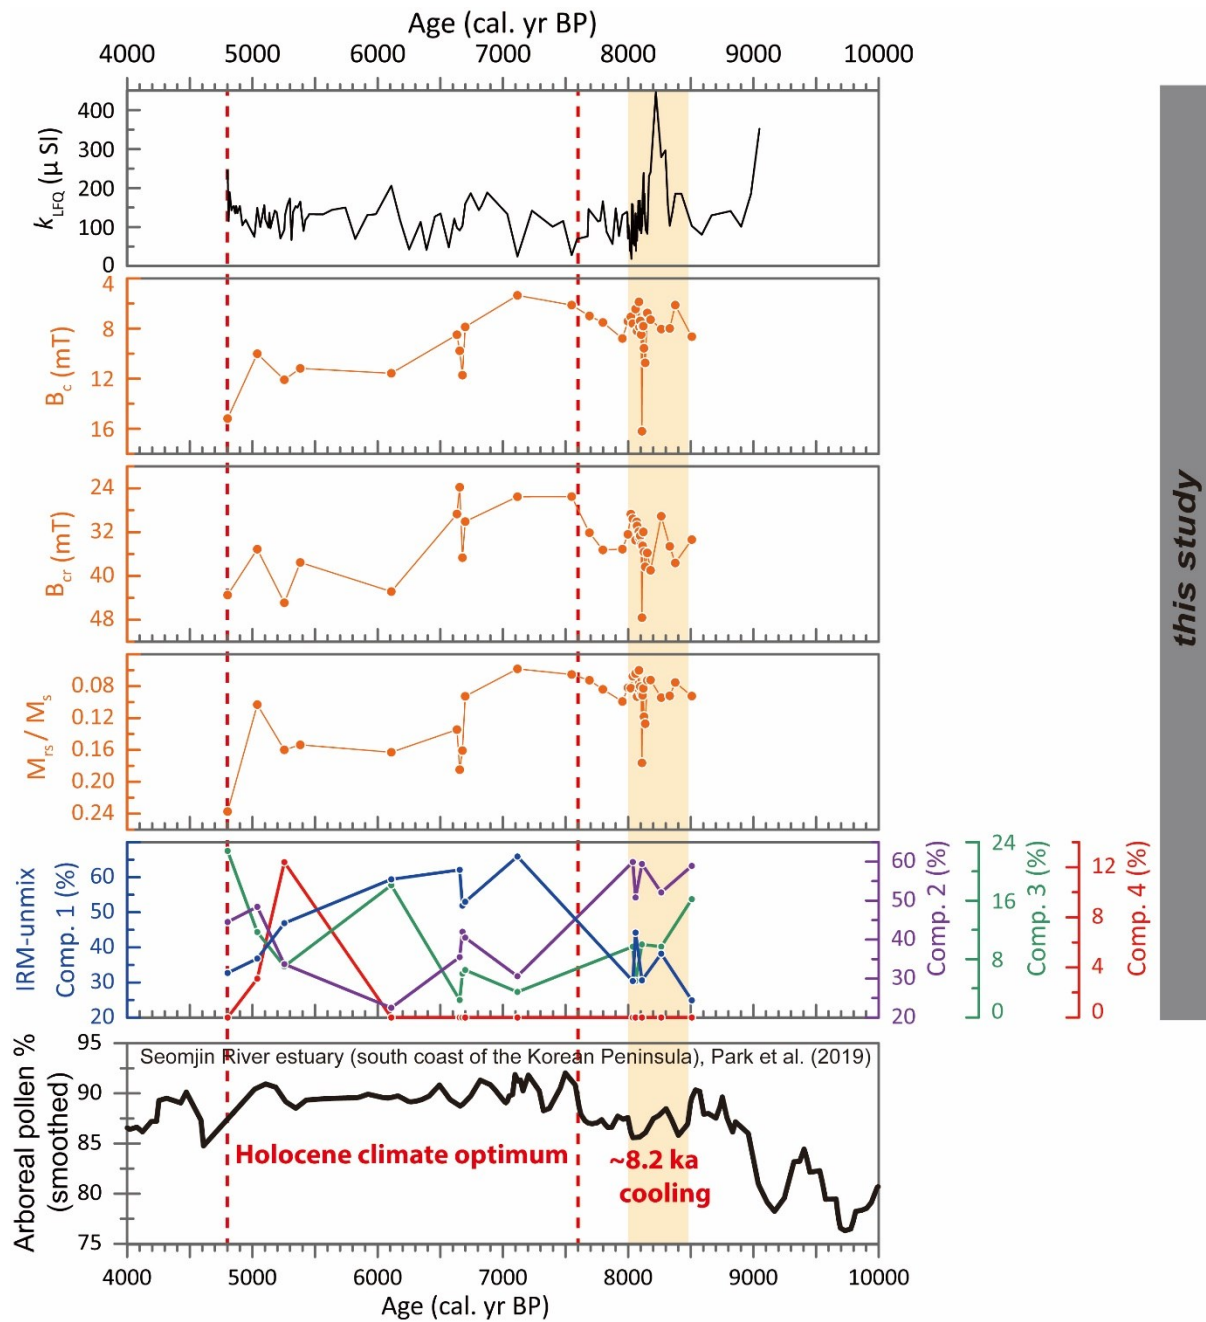

**Figure S4.** Comparisons between arboreal pollen percentage (a smoothed trend; the red thick line in Figure 6 of Park et al., 2019) from a sediment core from the Seomjin River estuary (Park et al., 2019), which identifies the HCO and the 8.2 ka cooling event, and some selective magnetic properties presented in this study (see text for details). The period of the HCO for South Korea, and the period corresponding to the 8.2 ka event with cool and dry condition, identified by Park et al. (2019), are bounded by red dash lines, and are indicated by orange-colored shading, respectively.
